# Supplementary material for: Deep drilling reveals massive shifts in evolutionary dynamics after formation of ancient ecosystem
Source: PubMed Central journal article supplement — Sci Adv. 2020 Sep 30;6(40):eabb2943. doi: 10.1126/sciadv.abb2943 (PMC7527215; doi:10.1126/sciadv.abb2943), 2020-09-30
Supplement: abb2943_SM.pdf [file abb2943_SM.pdf]

[advances.sciencemag.org/cgi/content/full/6/40/eabb2943/DC1](https://advances.sciencemag.org/cgi/content/full/6/40/eabb2943/DC1)

## Supplementary Materials for

### **Deep drilling reveals massive shifts in evolutionary dynamics after formation of ancient ecosystem**

Thomas Wilke\*, Torsten Hauffe, Elena Jovanovska, Aleksandra Cvetkoska, Timme Donders, Klemens Ekschmitt, Alexander Francke, Jack H. Lacey, Zlatko Levkov, Charles R. Marshall, Thomas A. Neubauer, Daniele Silvestro, Björn Stelbrink, Hendrik Vogel, Christian Albrecht, Jens Holtvoeth, Sebastian Krastel, Niklas Leicher, Melanie J. Leng, Katja Lindhorst, Alessia Masi, Nadja Ognjanova-Rumenova, Konstantinos Panagiotopoulos, Jane M. Reed, Laura Sadori, Slavica Tofilovska, Bert Van Bocxlaer, Friederike Wagner-Cremer, Frank P. Wesselingh, Volkmar Wolters, Giovanni Zanchetta, Xiaosen Zhang, Bernd Wagner

\*Corresponding author. Email: [tom.wilke@allzool.bio.uni-giessen.de](mailto:tom.wilke@allzool.bio.uni-giessen.de)

Published 30 September 2020, *Sci. Adv.* **6**, eabb2943 (2020)  
DOI: 10.1126/sciadv.abb2943

#### **The PDF file includes:**

Figs. S1 to S8  
Legends for data S1 to S3  
References

#### **Other Supplementary Material for this manuscript includes the following:**

(available at [advances.sciencemag.org/cgi/content/full/6/40/eabb2943/DC1](https://advances.sciencemag.org/cgi/content/full/6/40/eabb2943/DC1))

Data S1 to S3

## Supplementary Materials

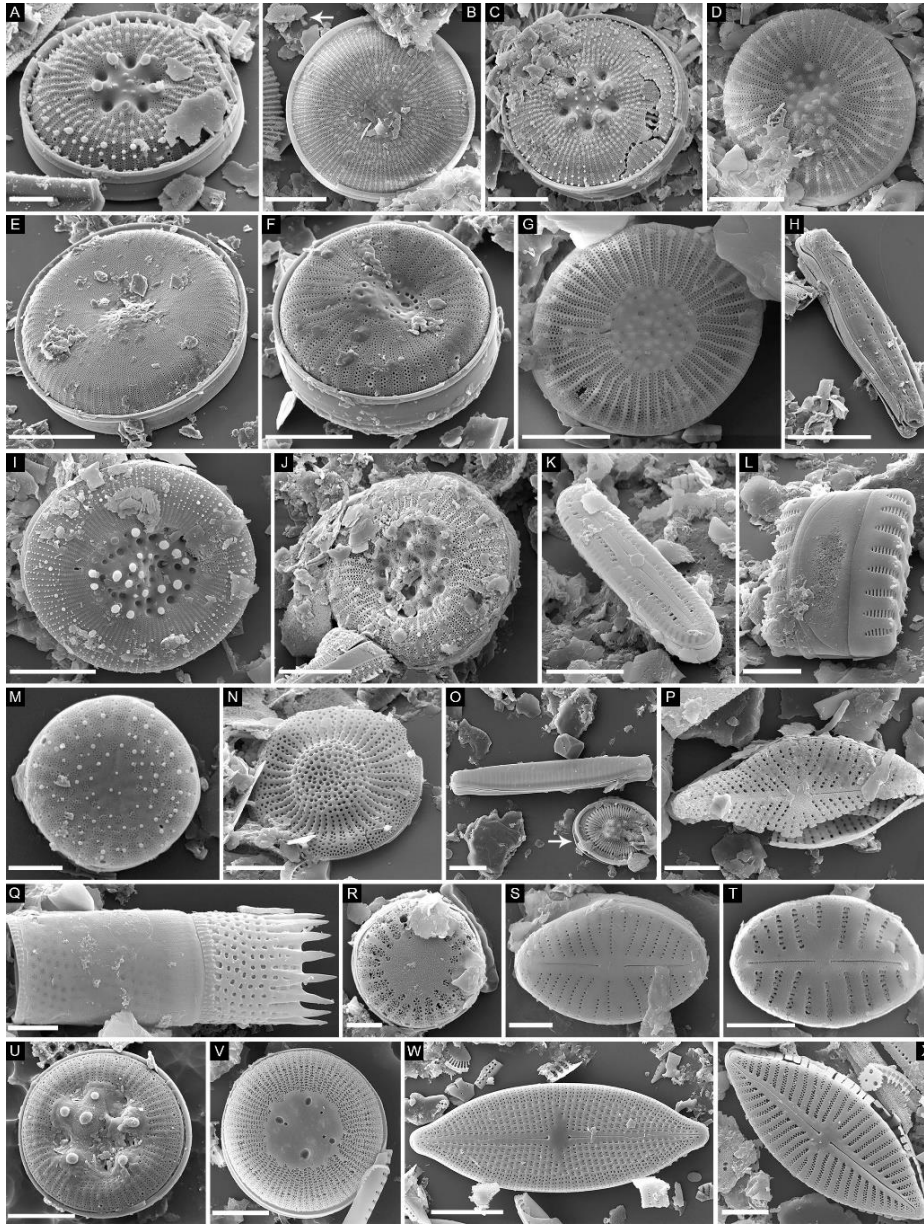

**Fig. S1. Representative scanning electron micrographs showing the preservation of planktonic and benthic diatoms throughout the Lake Ohrid DEEP-5045-1 sediment record. (A) *Pantocsekiella ocellata* var. 2 in 'pristine' state. (B) *Cyclotella fottii* in 'pristine' state; note the white arrowed *Pantocsekiella ocellata* in progressively dissolved and broken state. (C) *Pantocsekiella ocellata* var. 2 in weakly dissolved and broken state. (D) *Cyclotella fottii* in moderately dissolved state. (E) *Cyclotella fottii* in 'pristine' state. (F) *Cyclotella fottii* in 'pristine' state. (G) *Cyclotella fottii* in moderately dissolved state. (H) *Gomphonema mihoi* in weakly dissolved state. (I) *Cyclotella cavitata* in 'pristine' state. (J) *Cyclotella cavitata* in progressively dissolved state. (K) *Fallacia* sp. nov. in 'pristine' state. (L) *Staurosirella pinnata* in moderately dissolved state. (M) *Cribrionella ohridana* in 'pristine' state. (N) *Stephanodiscus transylvanicus* in dissolved state. (O) *Diatoma ehrenbergii* in 'pristine' state; note the white arrowed *Cyclotella cavitata* in a progressively dissolved state. (P) *Placoneis balcanica* in progressively dissolved state. (Q) *Aulacoseira subarctica* in 'pristine' state. (R) *Cribrionella ohridana* in progressively dissolved state. (S) *Sellaphora* sp. in 'pristine' state. (T) *Sellaphora* sp. in dissolved state. (U) *Pantocsekiella* sp. nov. 2 in 'pristine' state. (V) *Pantocsekiella* sp. nov. 1 in progressively dissolved state. (W) *Aneumastus* sp. nov. 2 in 'pristine' state; (X) *Paraplaconeis prespanensis* in progressively dissolved stage. (A–D). Interglacial stage (MIS-5), from ~0.07–0.13 Ma. (E–H). Glacial stage (MIS-6), from ~0.13–0.18 Ma. (I–L). Interglacial stage (MIS-15), from ~0.57–0.62 Ma. (M–P). Glacial stage (MIS-16), from ~0.62–0.66 Ma. (Q–T). Glacial stage (MIS-38), from ~1.24–1.29 Ma. (U–X). Interglacial stage (MIS-41), from ~1.29–1.36 Ma. Note the morphological variability in *Cyclotella fottii* during the MIS 6/5 glacial-interglacial cycle. Scale bars (B, E, H–J, O, and W) = 10  $\mu$ m; (C, D, F, G, K, L, N, P, U, V, and X) = 5  $\mu$ m; (A, Q, S, and T) = 2  $\mu$ m; Figs (M and R) = 1  $\mu$ m.**

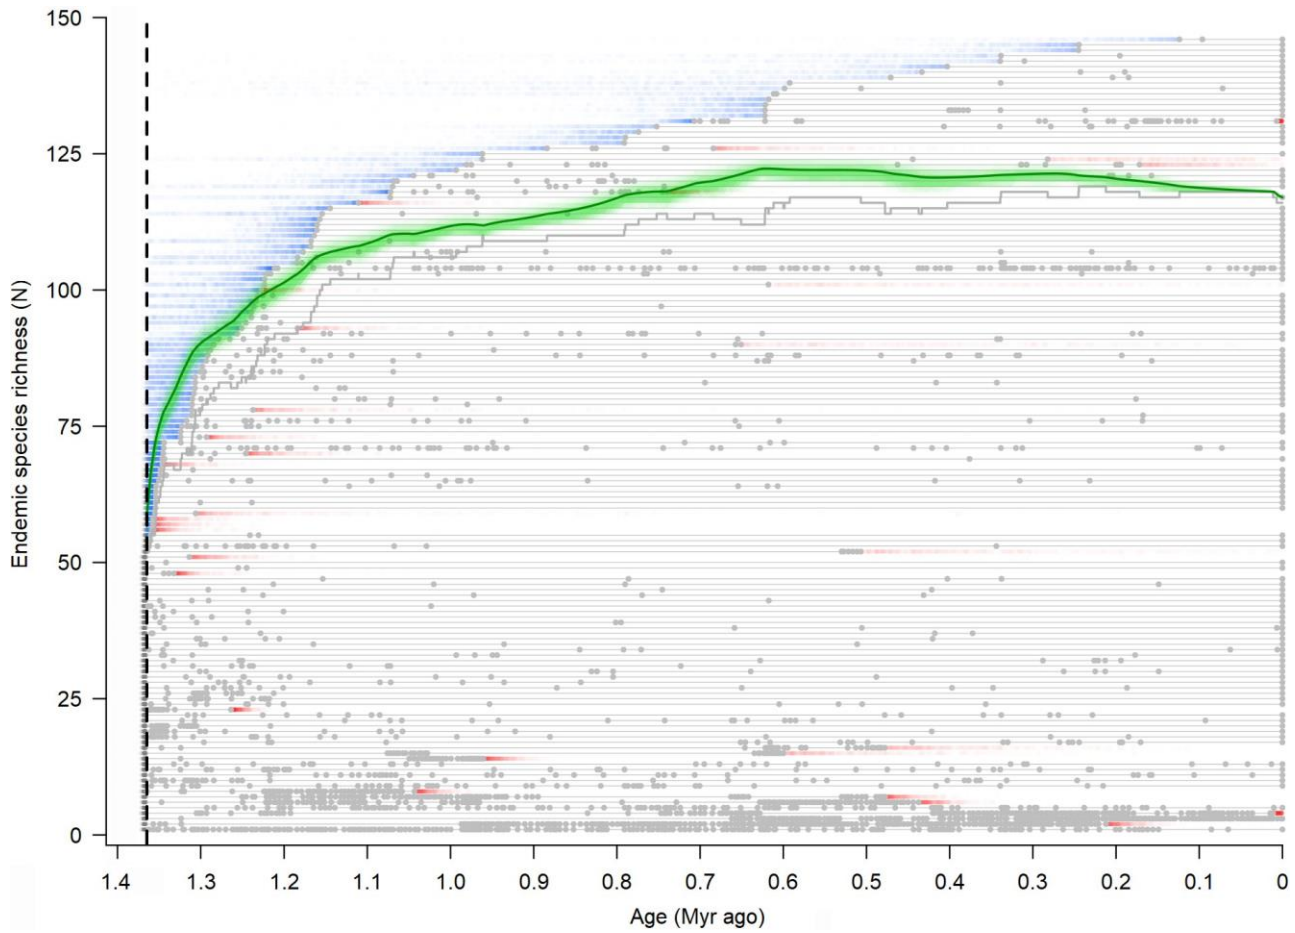

**Fig. S2. Lake Ohrid species accumulation curves for endemic diatom species.** Species are ordered according to time of appearance (speciation). Black dashed line, time of lake formation 1.36 Myr ago; grey dots, fossil counts; blue dots, speciation events (incl. preservation bias); red dots, extinction events (incl. preservation bias); dark grey line, uncorrected species accumulation curve; green line, species accumulation curve corrected for preservation bias; green shading, 95% credible interval.

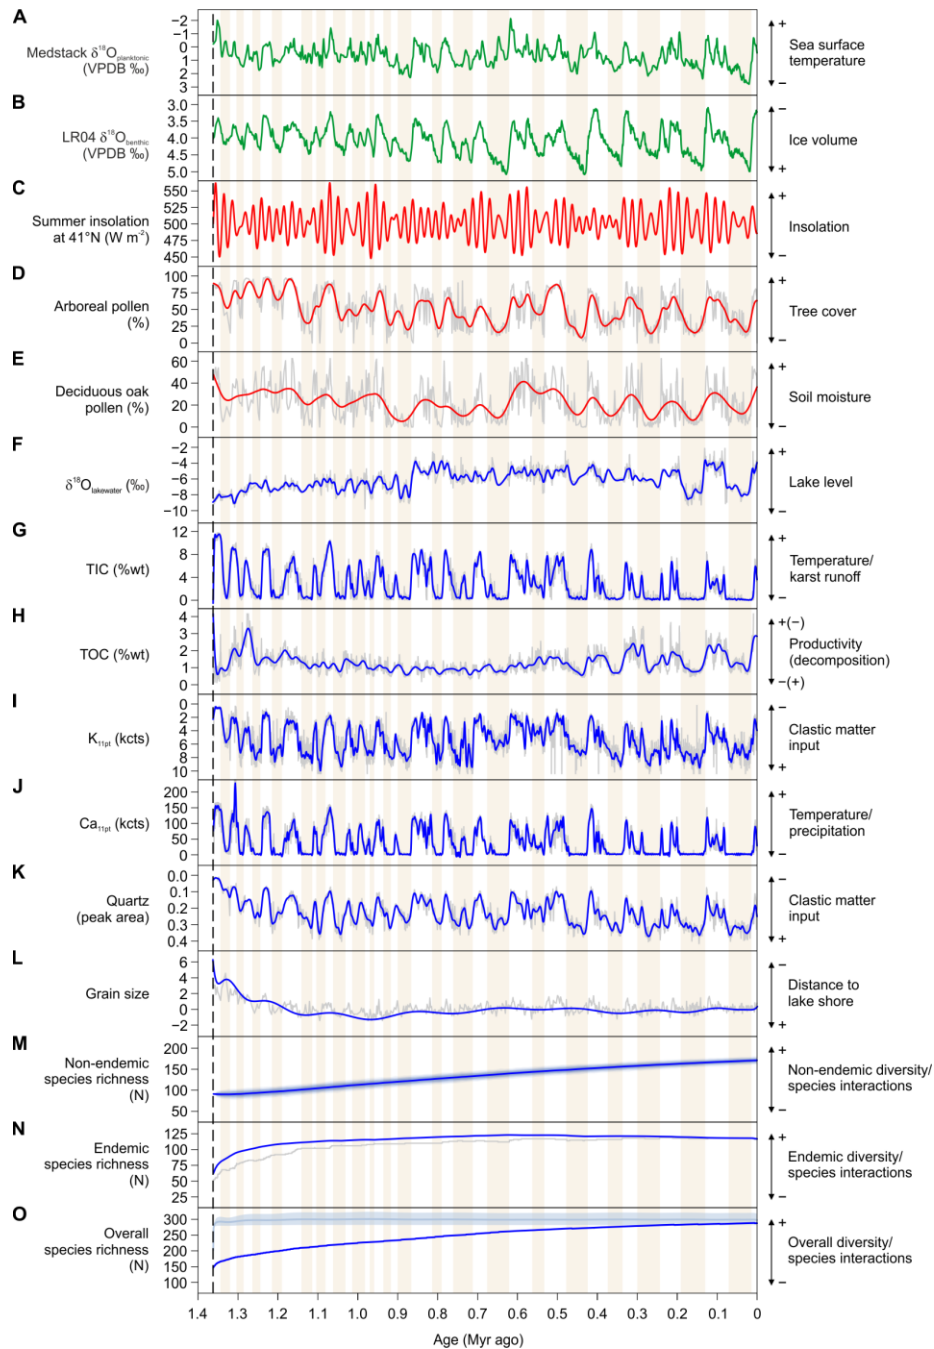

**Fig. S3. Lake Ohrid environmental and climate indicator time series and diatom species richness curves.** Raw data are shown in grey, processed data in colour (for details see Materials and Methods). Global, regional and local indicators are shown as green, red and blue curves, respectively. Black dashed line, time of lake formation; brown bars, glacial periods. Data for panels **A**, **B**, **D**, **E** and **G–K** were published previously. (**A**) Medstack  $\delta^{18}\text{O}$  planktonic isotope ratios in parts per thousand relative to VPDB (33); (**B**) LR04 benthic  $\delta^{18}\text{O}$  stack isotope ratios in parts per thousand relative to VPDB (34); (**C**) Northern Hemisphere summer insolation at the latitude of Lake Ohrid ( $41^\circ\text{N}$ ) (35); (**D**) Percentages of arboreal pollen excluding *Pinus* pollen at Lake Ohrid (13); (**E**) Percentage of pollen from deciduous oaks at Lake Ohrid (13); (**F**) Lake Ohrid  $\delta^{18}\text{O}_{\text{lakewater}}$  based on calcite and siderite  $\delta^{18}\text{O}$  information; (**G**) Lake Ohrid total inorganic carbon (TIC) concentrations (13); (**H**) Lake Ohrid total organic carbon (TOC) concentrations (13); (**I**) Lake Ohrid potassium (K) counts from XRF scanning (13); (**J**) Lake Ohrid calcium (Ca) counts from XRF scanning (13); (**K**) Lake Ohrid relative sedimentary quartz content (13); (**L**) Lake Ohrid grain size information (summarized by ordination); (**M**) Lake Ohrid species accumulation curve for non-endemic diatom species corrected for preservation bias; (**N**) Lake Ohrid species accumulation curves for endemic diatom species. Blue accumulation curve, data corrected for preservation bias; (**O**) Lake Ohrid species accumulation curve for endemic and non-endemic diatom species combined. The diatom community has not yet reached a dynamic equilibrium. Maximum standing diversity in the dataset studied is 288 species; estimated equilibrium diversity varies as a function of lake size (shaded blue area). **M**, **N**, **F**, **L**, **N**, Data are the same as in Fig. 2.

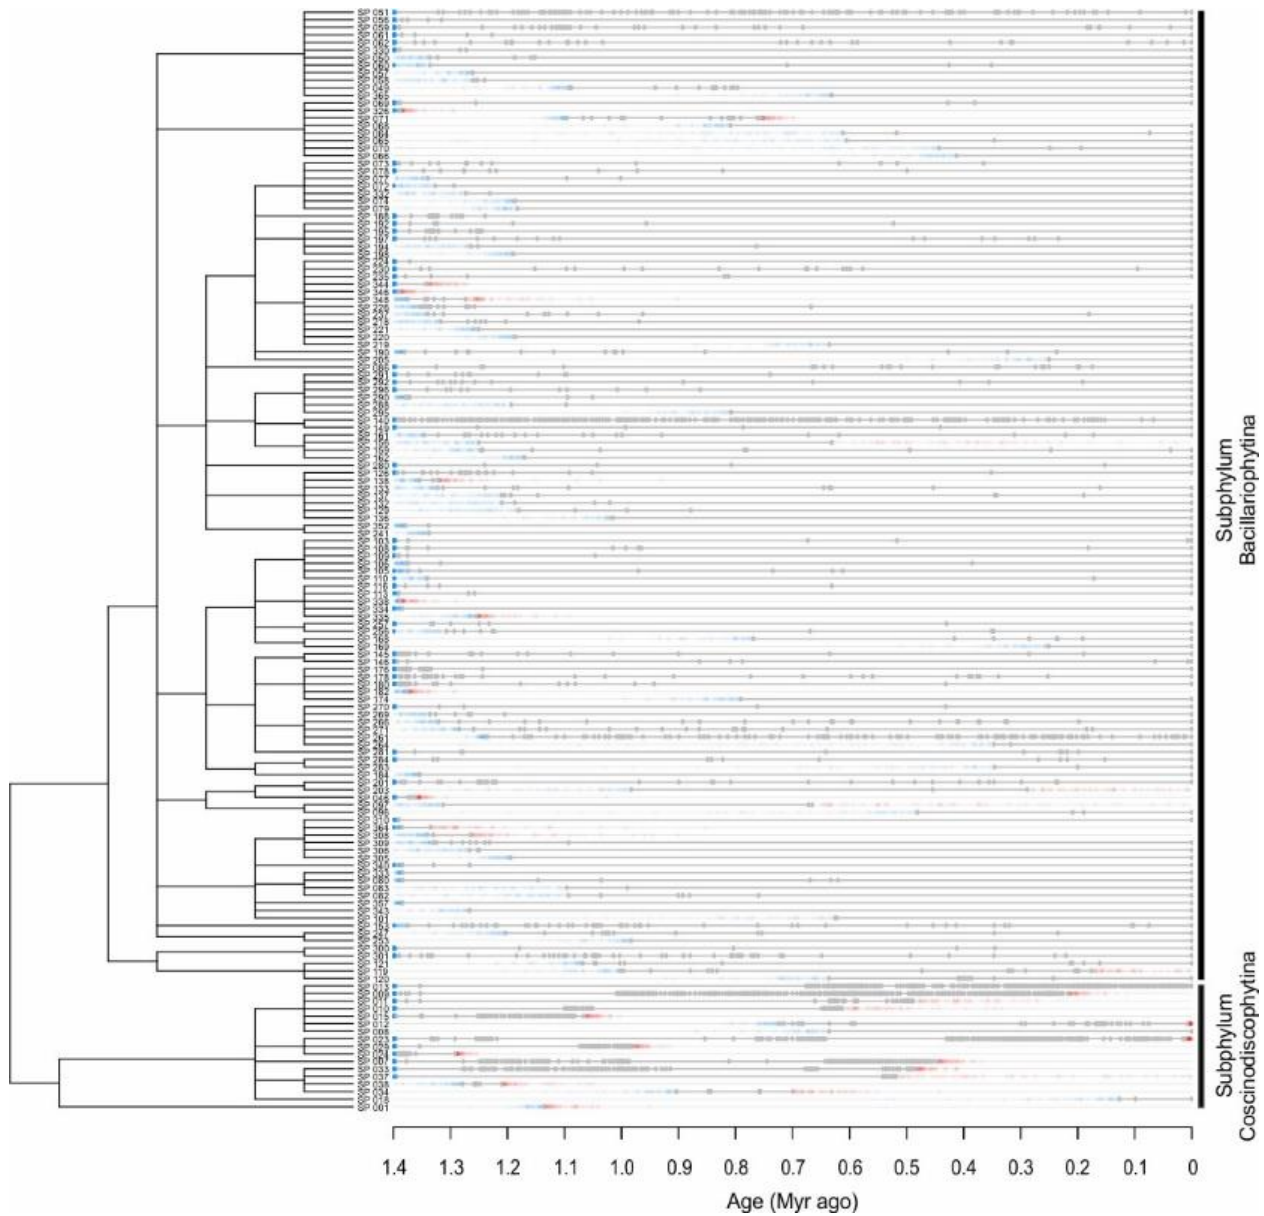

**Fig. S4. Lake Ohrid diatom systematic relationships and speciation and extinction events of endemic species.** Systematic tree is based on difference between taxonomic ranks that equal a branch length of 1 unit (for details see Materials and Methods). For species codes see Data S1. Species are ordered according to systematic relationships at the considered taxonomic levels (52). Grey dots, fossil counts; blue dots, speciation events (incl. preservation bias); red dots, extinction events (incl. preservation bias). There is a significant signal of selective extinction ( $D = 0.37$ ,  $p_{D < 1} = 0.00$ ,  $p_{D > 0} = 0.13$ ), as can be seen, for example, in the planktonic subphylum Coscinodiscophytina, in which most members go extinct over time.

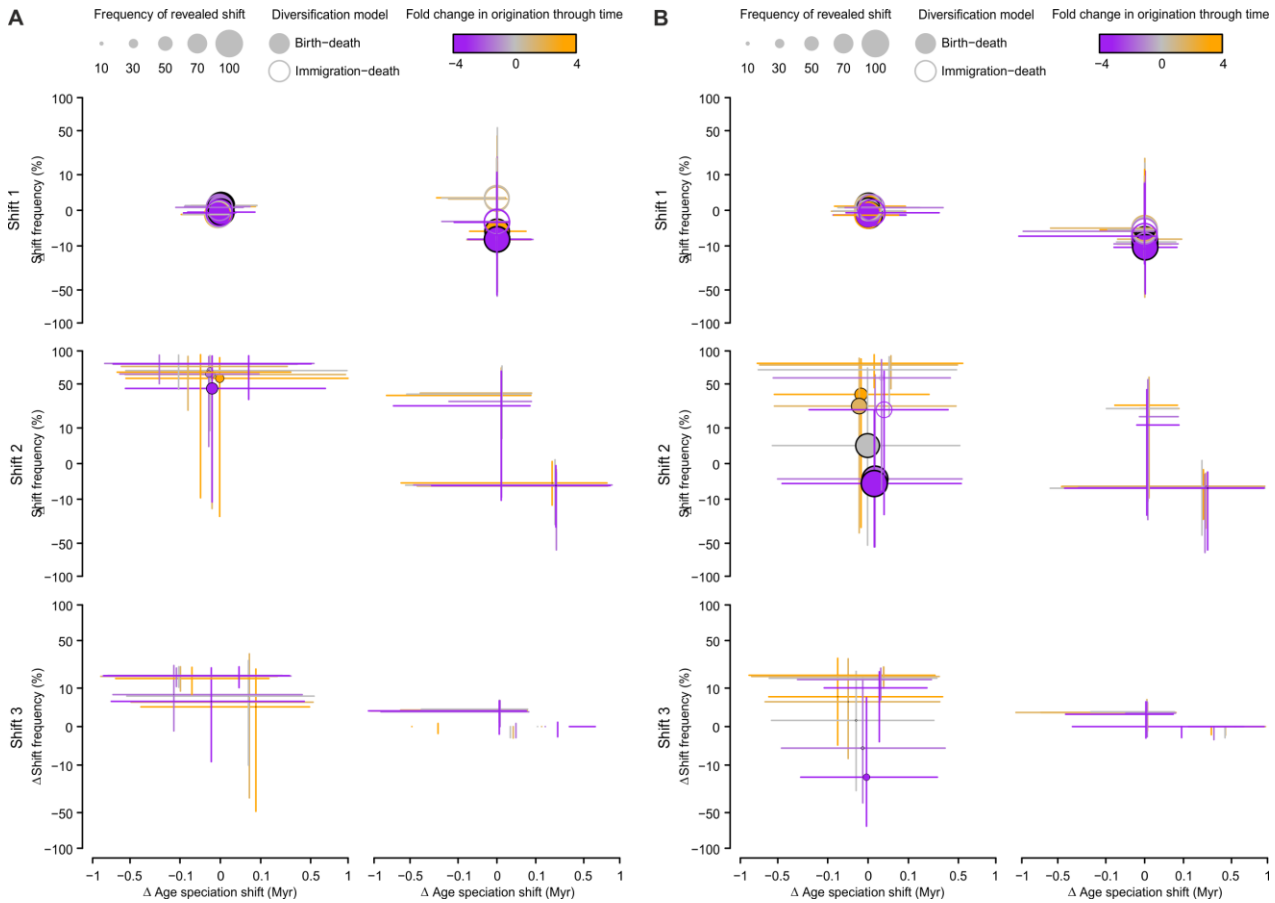

**Fig. S5. Robustness of inferred ages of rate shifts and their frequency in being sampled during the Bayesian inference against the effect of missing < 25% extant species.** (A) Simulated first appearance times of species by a phylogenetic Yule model representing exclusively in-situ cladogenesis and (B) probabilistic sampling of first appearance times with in- and decreasing rates and probabilities, respectively (color gradient). Rate shifts were inferred with birth-death and colonization-death models in PyRate (closed and open circles, respectively). We summarized the prevalence of inferred shifts for the complete sampling (circle size), how the frequency of sampled shifts changes (y-axis; with positive values indicating more frequently sampled shifts in the incomplete data) and the effect on shift age (x-axis; with positive values indicating a bias towards older shifts under incomplete sampling). Circles are placed at the median across the 100 simulations and lines display the 95% variation interval. The results show that a complete taxon sampling would not affect the age of the oldest shifts (shift 1) for the speciation and extinction rates, and even a 4 fold decrease in the speciation rate through time (i.e., missing taxa are old) would only reduce the frequency of sampling the extinction shift during Bayesian inference by 10%. The identified younger, less pronounced drop in the speciation rate (shift 2) could be 0.1 Ma younger under a complete taxon sampling and would be sampled less frequently when the missing taxa are young. Small circles indicate that an additional 2nd shift in the extinction rate or 3rd shift in the speciation rate could not be detected by a simulated complete taxon sampling.



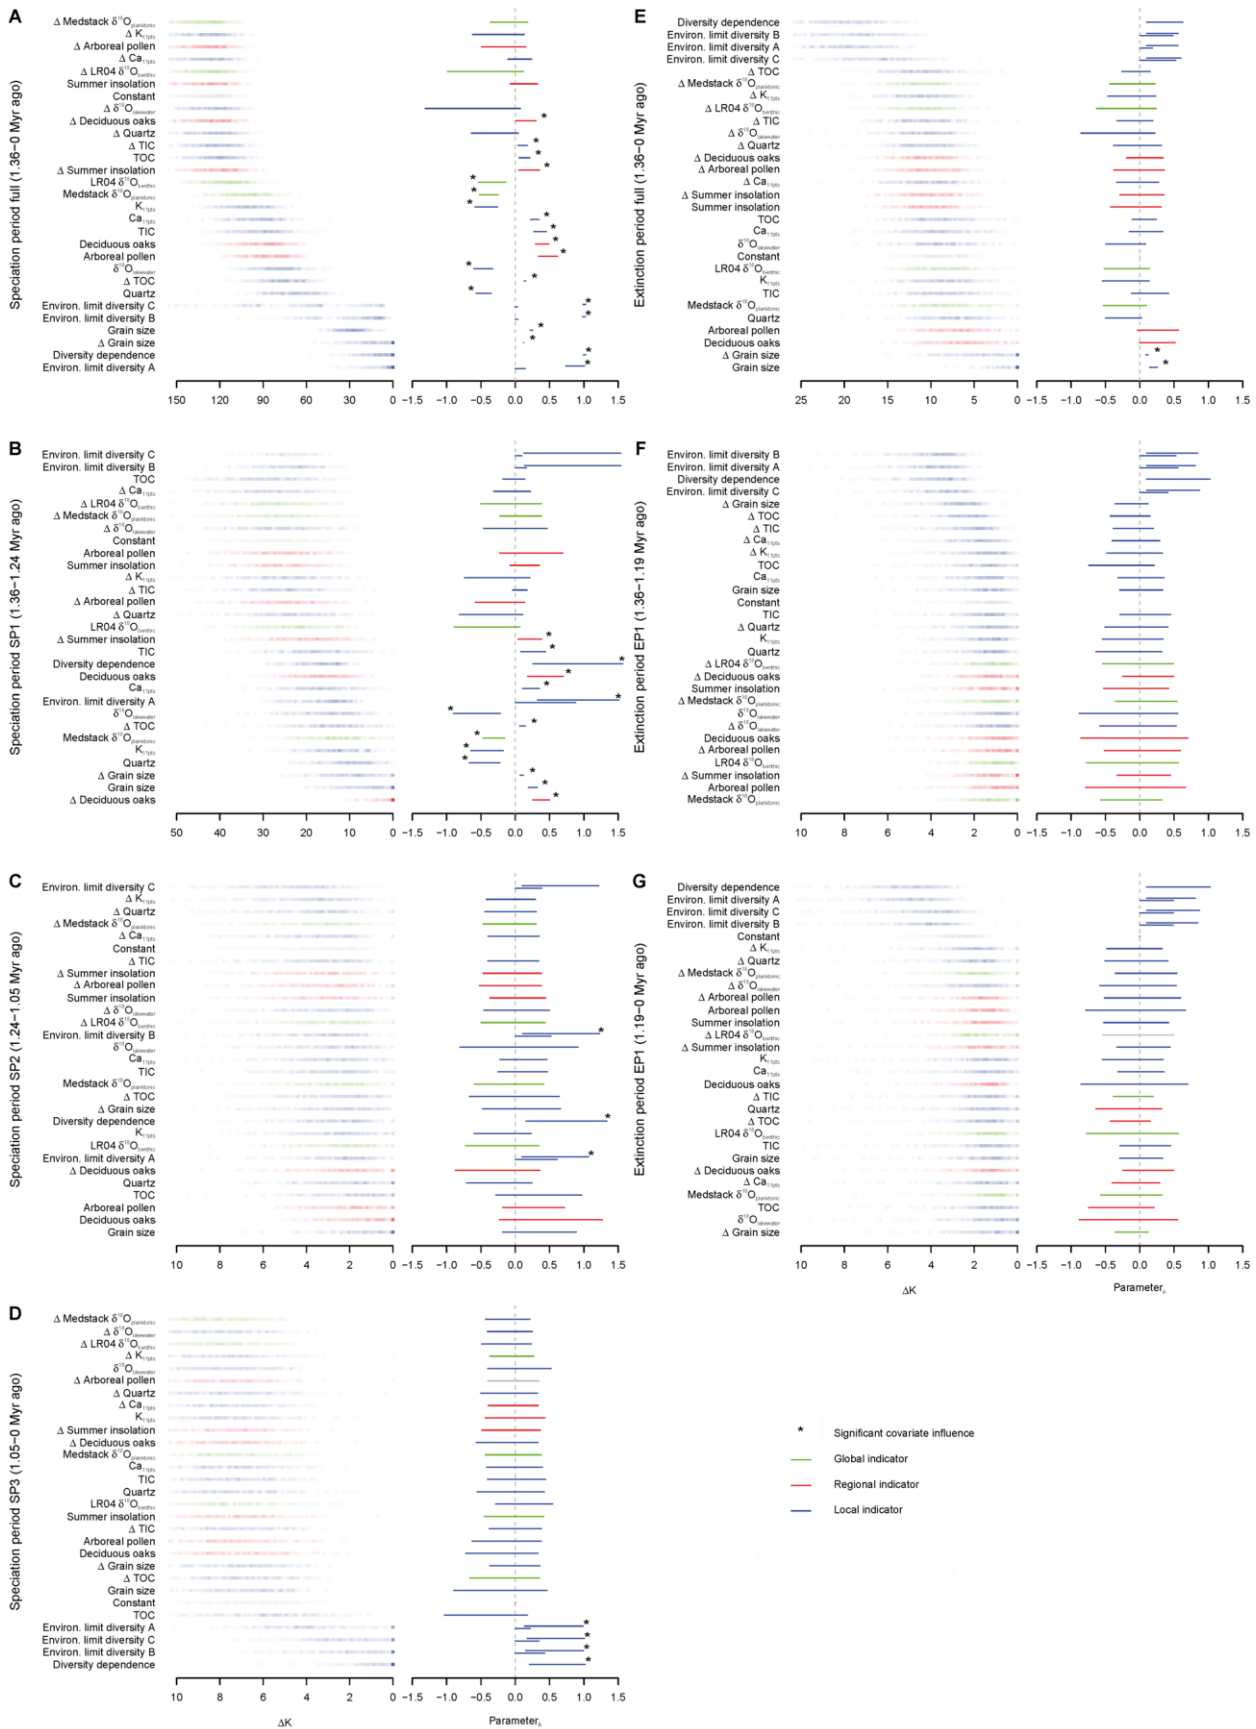

**Fig. S6. Comparison of relative model support and correlation strength of speciation and extinction rates with climate, environmental and diversity indicators. Plots summarize the results of the diversification analyses of**

covariate influence over the entire period of 1.36 Myr (**A, E**) and within the three speciation (**B–D**) and two extinction rate periods (**F, G**). For environmental and climate indicators, both the influence of the change of the parameter per 1,000 years ( $\Delta$ ) and that of the total value were tested. Left panels of the plots show the ranking of covariates according to the difference in the Bayes Factor  $K$  to the best-fit model within 300 replicated datasets (dots), thereby integrating the uncertainty in speciation and extinction times. Lines in the right panels quantify the uncertainty in model parameters for the correlation between rates and covariates across all replicates through 95% HPD intervals. The model parameter shown for the diversity dependent model is the reciprocal of the carrying capacity, with values below 1 indicating an unattained environmentally-defined ecological limit. Models for an environmentally-defined ecological limit include a second line for the parameter Arrhenius- $z$ , which shows the exponent for converting the environmental covariate to a carrying capacity. For all other models, the only parameter displayed is the linear correlation strength  $\gamma$  of rates and covariates. Covariates with model parameters significantly different from zero, i.e., which do not intersect the grey dashed line, are marked with an asterisk. Covariates shown to the left of the dashed line (–) are negatively correlated, to the right of the dashed line (+) are positively correlated. Environ. limit diversity A, B, C = environmentally-dependent limits to diversity based on grain size information,  $\delta^{18}\text{O}_{\text{lakewater}}$  values and quartz content, respectively.



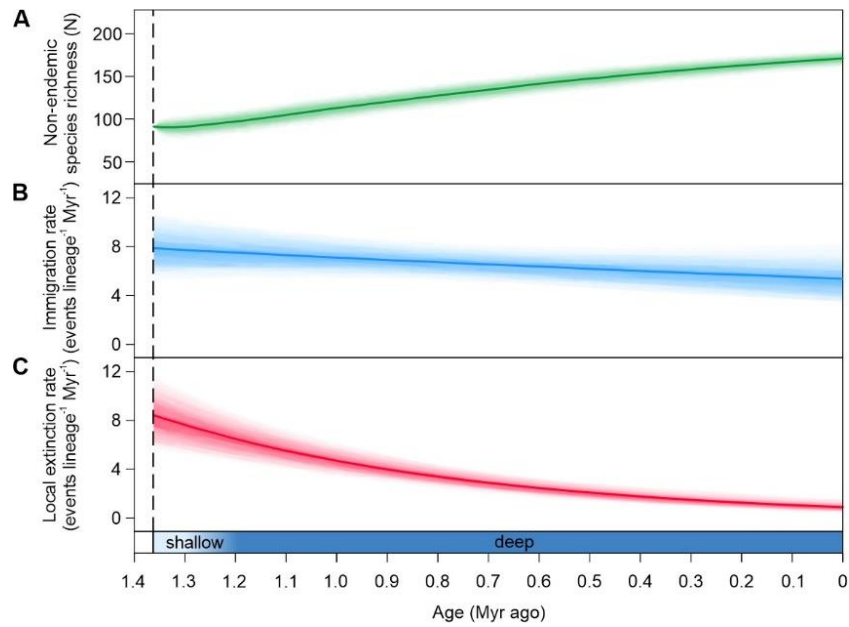

**Fig. S7. Species accumulation curve and immigration and local extinction rates for non-endemic diatom species in Lake Ohrid spanning the past 1.36 Myr.** Black dashed line, time of lake formation; blue bar at bottom of figure, lake phases (shallow and deep) (17). **(A)** Species accumulation curve for non-endemic diatom species corrected for preservation bias (data are the same as in Fig. S3M); **(B)** Per-lineage immigration rate and 95% confidence interval (blue shading); **(C)** Per-lineage local extinction rate and 95% confidence interval (red shading).

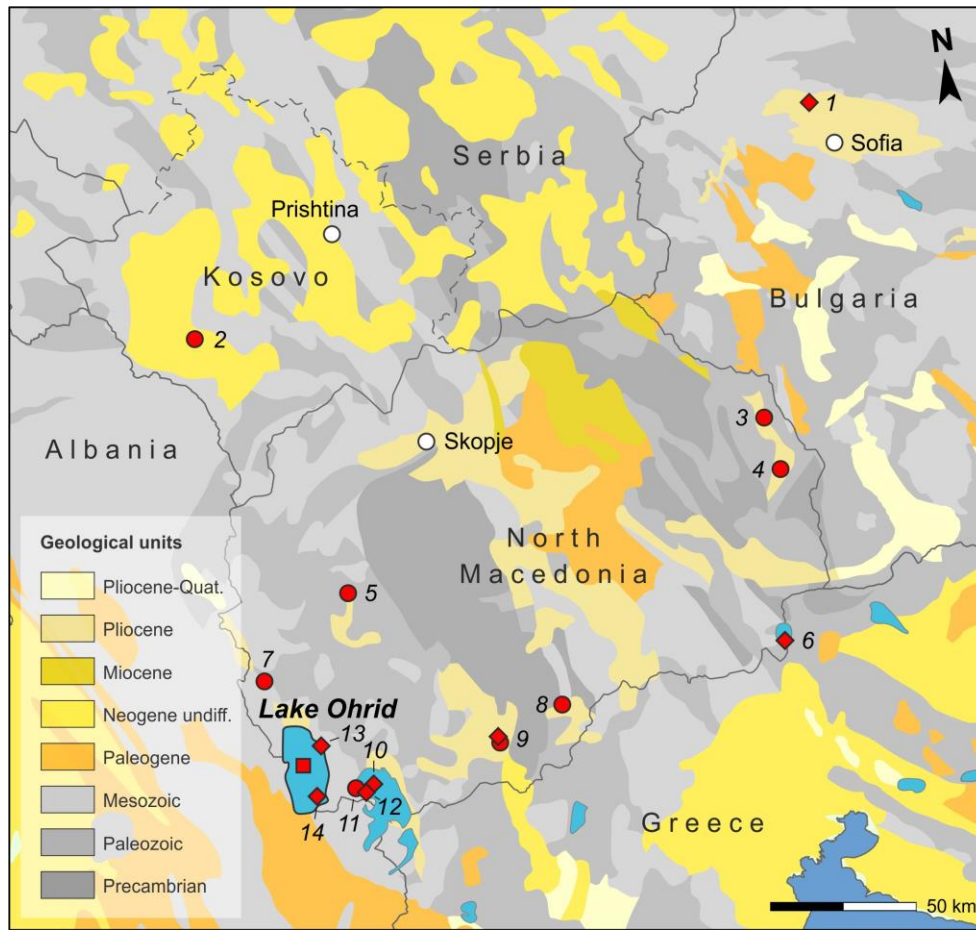

**Fig. S8. Geological map of the southern Balkans showing the location of Late Miocene–Pleistocene diatomites and lake successions that were used to determine what species are endemic to Lake Ohrid.** Major cities are indicated with white circles, outcrops with red circles, the Ohrid DEEP core site with a red square, other coring locations with red diamonds. The geological map is simplified from the International Geological Map of Europe and Adjacent Areas (IGME 5000). Stratigraphic details were taken from the literature (65). 1, core C-14 taken near Katina (Sofia Basin, Novi Iskar Formation); 2, outcrop near Dakovica (Metohia Basin, Metohia Formation); 3, outcrop near Star Istevnik (Delchevo-Pehchevo Basin, Pantcharevo Formation); 4, outcrop near Brestovi (Berovo Basin, Pantcharevo Formation); 5, outcrop near Ovcha reka (Kichevo Basin, unnamed Pliocene formation); 6, Lake Dojran core Co1260 (12.5 kyr); 7, outcrop near Crn Drim (Piskupshtina Basin, Piskupshtina Formation); 8, outcrops near Vitolishte and Manastir (Mariovo Basin, Nerezi-Vitachevo formations); 9, outcrop “Suvodol mine” and core B-466 near Vranjevci (Pelagonia Basin, Pelagonian Formation); 10, Lake Prespa core Co1215 (90.0 kyr); 11, outcrop between Zarina and Leskovec (Prespa Basin, unnamed Pliocene formation); 12, Lake Prespa core Co1204 (48.0 kyr); 13, Lake Ohrid core Co1202 (135 kyr); 14, Lake Ohrid core Lz1120 (40 kyr).

**Data S1. (separate file)**

Diatom counts and taxonomic, life style, endemicy and voucher information for the Lake Ohrid DEEP site.

**Data S2. (separate file)**

Grain size data for the Lake Ohrid DEEP site.

**Data S3. (separate file)**

$\delta^{18}\text{O}_{\text{lakewater}}$  data for Lake Ohrid Co1262 and DEEP sites.

## REFERENCES AND NOTES

1. M. J. Benton, Origins of biodiversity. *PLOS Biol.* **14**, e2000724 (2016).
2. G. G. Simpson, *The Major Features of Evolution* (Columbia University Press, 1953).
3. D. Schluter, *The Ecology of Adaptive Radiation* (Oxford University Press, 2000).
4. R. J. Whittaker, K. A. Triantis, R. J. Ladle, ORIGINAL ARTICLE: A general dynamic theory of oceanic island biogeography. *J. Biogeogr.* **35**, 977–994 (2008).
5. S. Hubbell, *The Unified Neutral Theory of Biodiversity and Biogeography* (Princeton University Press 2001).
6. G. A. Wellborn, R. B. Langerhans, Ecological opportunity and the adaptive diversification of lineages. *Ecol. Evol.* **5**, 176–195 (2015).
7. D. L. Rabosky, R. E. Glor, Equilibrium speciation dynamics in a model adaptive radiation of island lizards. *Proc. Natl. Acad. Sci. U.S.A.* **107**, 22178–22183 (2010).
8. J. Rosindell, A. B. Phillimore, A unified model of island biogeography sheds light on the zone of radiation. *Ecol. Lett.* **14**, 552–560 (2011).
9. T. M. Smiley, Detecting diversification rates in relation to preservation and tectonic history from simulated fossil records. *Paleobiology* **44**, 1–24 (2018).
10. T. B. Quental, C. R. Marshall, Diversity dynamics: Molecular phylogenies need the fossil record. *Trends Ecol. Evol.* **25**, 434–441 (2010).
11. S. Louca, M. W. Pennell, Extant timetrees are consistent with a myriad of diversification histories. *Nature* **850**, 502–505 (2020).
12. C. Albrecht, T. Wilke, Ancient Lake Ohrid: Biodiversity and evolution. *Hydrobiologia* **615**, 103–140 (2008).

13. B. Wagner, H. Vogel, A. Francke, T. Friedrich, T. Donders, J. H. Lacey, M. J. Leng, E. Regattieri, L. Sadori, T. Wilke, G. Zanchetta, C. Albrecht, A. Bertini, N. Combourieu-Nebout, A. Cvetkoska, B. Giaccio, A. Grazhdani, T. Hauffe, J. Holtvoeth, S. Joannin, E. Jovanovska, J. Just, K. Kouli, I. Kousis, A. Koutsodendris, S. Krastel, M. Lagos, N. Leicher, Z. Levkov, K. Lindhorst, A. Masi, M. Melles, A. M. Mercuri, S. Nomade, N. Nowaczyk, K. Panagiotopoulos, O. Peyron, J. M. Reed, L. Sagnotti, G. Sinopoli, B. Stelbrink, R. Sulpizio, A. Timmermann, S. Tofilovska, P. Torri, F. Wagner-Cremer, T. Wonik, X. Zhang, Mediterranean winter rainfall in phase with African monsoons during the past 1.36 million years. *Nature* **573**, 256–260 (2019).
14. B. Stelbrink, E. Jovanovska, Z. Levkov, N. Ognjanova-Rumenova, T. Wilke, C. Albrecht, Diatoms do radiate: Evidence for a freshwater species flock. *J. Evol. Biol.* **31**, 1969–1975 (2018).
15. A. Cvetkoska, A. Pavlov, E. Jovanovska, S. Tofilovska, S. Blanco, L. Ector, F. Wagner-Cremer, Z. Levkov, Spatial patterns of diatom diversity and community structure in ancient Lake Ohrid. *Hydrobiologia* **819**, 197–215 (2018).
16. A. S. Cohen, *Paleolimnology: The History and Evolution of Lake Systems* (Oxford University Press, 2003).
17. K. Panagiotopoulos, J. Holtvoeth, K. Kouli, E. Marinova, A. Francke, A. Cvetkoska, E. Jovanovska, J. H. Lacey, E. T. Lyons, C. Buckel, A. Bertini, T. Donders, J. Just, N. Leicher, M. J. Leng, M. Melles, R. D. Pancost, L. Sadori, P. Tauber, H. Vogel, B. Wagner, T. Wilke, Insights into the evolution of the young Lake Ohrid ecosystem and vegetation succession from a southern European refugium during the Early Pleistocene. *Quat. Sci. Rev.* **227**, 106044 (2020).
18. S. Fritz, A. Purvis, Selectivity in mammalian extinction risk and threat types: A new measure of phylogenetic signal strength in binary traits. *Conserv. Biol.* **24**, 1042–1051 (2010).
19. C. R. Marshall, Five palaeobiological laws needed to understand the evolution of the living biota. *Nat. Ecol. Evol.* **1**, 0165 (2017).
20. P. O'Sullivan, C. S. Reynolds, *The Lakes Handbook: Lake Restoration and Rehabilitation*, vol. 2 (Wiley 2008).

21. R. Barry, P. Blanken, 8 - Microclimates of Physical Systems, in *Microclimate and Local Climate*, R. G. Barry, P. Blanken, Eds. (Cambridge University Press, 2016), pp. 187–217.
22. T. Nakov, J. M. Beaulieu, A. J. Alverson, Diatoms diversify and turn over faster in freshwater than marine environments. *Evolution* **73**, 2497–2511 (2019).
23. D. Jablonski, Approaches to macroevolution: 2. Sorting of variation, some overarching issues, and general conclusions. *Evol. Biol.* **44**, 451–475 (2017).
24. C. A. Serván, J. A. Capitán, J. Grilli, K. E. Morrison, S. Allesina, Coexistence of many species in random ecosystems. *Nat. Ecol. Evol.* **2**, 1237–1242 (2018).
25. K. Lindhorst, S. Krastel, K. Reicherter, M. Stipp, B. Wagner, T. Schwenk, Sedimentary and tectonic evolution of Lake Ohrid (Macedonia/Albania). *Basin Research* **27**, 84–101 (2015).
26. J. H. Lacey, M. D. Jones, Quantitative reconstruction of early Holocene and last glacial climate on the Balkan Peninsula using coupled hydrological and isotope mass balance modelling. *Quat. Sci. Rev.* **202**, 109–121 (2018).
27. B. Wagner, T. Wilke, A. Francke, C. Albrecht, H. Baumgarten, A. Bertini, N. Combourieu-Nebout, A. Cvetkoska, M. D’Addabbo, T. H. Donders, K. Föller, B. Giaccio, A. Grazhdani, T. Hauffe, J. Holtvoeth, S. Joannin, E. Jovanovska, J. Just, K. Kouli, A. Koutsodendris, S. Krastel, J. H. Lacey, N. Leicher, M. J. Leng, Z. Levkov, K. Lindhorst, A. Masi, A. M. Mercuri, S. Nomade, N. Nowaczyk, K. Panagiotopoulos, O. Peyron, J. M. Reed, E. Regattieri, L. Sadori, L. Sagnotti, B. Stelbrink, R. Sulpizio, S. Tofilovska, P. Torri, H. Vogel, T. Wagner, F. Wagner-Cremer, G. A. Wolff, T. Wonik, G. Zanchetta, X. S. Zhang, The environmental and evolutionary history of Lake Ohrid (FYROM/Albania): Interim results from the SCOPSCO deep drilling project. *Biogeosciences* **14**, 2033–2054 (2017).
28. Z. Levkov, D. M. Williams, Checklist of diatoms (Bacillariophyta) from Lake Ohrid and Lake Prespa (Macedonia), and their watersheds. *Phytotaxa* **45**, 1–76 (2012).
29. A. Francke, B. Wagner, J. Just, N. Leicher, R. Gromig, H. Baumgarten, H. Vogel, J. H. Lacey, L. Sadori, T. Wonik, M. J. Leng, G. Zanchetta, R. Sulpizio, B. Giaccio, Sedimentological processes and



environmental variability at Lake Ohrid (Macedonia, Albania) between 637 ka and the present. *Biogeosciences* **13**, 1179–1196 (2016).

30. S. J. Blott, K. Pye, GRADISTAT: A grain size distribution and statistics package for the analysis of unconsolidated sediments. *Earth Surf. Proc. Land.* **26**, 1237–1248 (2001).
31. J. H. Lacey, A. Francke, M. J. Leng, C. H. Vane, B. Wagner, A high-resolution Late Glacial to Holocene record of environmental change in the Mediterranean from Lake Ohrid (Macedonia/Albania). *Int. J. Earth Sci.* **104**, 1623–1638 (2015).
32. J. H. Lacey, M. J. Leng, A. Francke, H. J. Sloane, A. Milodowski, H. Vogel, H. Baumgarten, G. Zanchetta, B. Wagner, Northern Mediterranean climate since the Middle Pleistocene: A 637 ka stable isotope record from Lake Ohrid (Albania/Macedonia). *Biogeosciences* **13**, 1801–1820 (2016).
33. P. Wang, J. Tian, L. J. Lourens, Obscuring of long eccentricity cyclicity in Pleistocene oceanic carbon isotope records. *Earth Planet. Sci. Lett.* **290**, 319–330 (2010).
34. L. E. Lisiecki, M. E. Raymo, A Pliocene–Pleistocene stack of 57 globally distributed benthic  $\delta^{18}\text{O}$  records. *Paleoceanography* **20**, PA1003 (2005).
35. J. Laskar, P. Robutel, F. Joutel, M. Gastineau, A. C. M. Correia, B. Levrard, A long-term numerical solution for the insolation quantities of the Earth. *Astron. Astrophys.* **428**, 261–285 (2004).
36. G. L. Simpson, Modelling palaeoecological time series using generalised additive models. *Front. Ecol. Evol.* **6**, 149 (2018).
37. S. N. Wood, Fast stable restricted maximum likelihood and marginal likelihood estimation of semiparametric generalized linear models. *J. Roy. Stat. Soc. B* **73**, 3–36 (2011).
38. R Core Team, R: A Language and Environment for Statistical Computing (R Foundation for Statistical Computing, Vienna, Austria, 2019); <https://www.R-project.org>.
39. K. G. van den Boogaart, R. Tolosana, M. Bren, Compositions: Compositional data analysis (2014); <http://CRAN.R-project.org/package=compositions>.

40. J. Oksanen, F. G. Blanchet, M. Friendly, R. Kindt, P. Legendre, D. McGlinn, P.R. Minchin, R. B. O'Hara, G. L. Simpson, P. Solymos, M. H. H. Stevens, E. Szoecs, H. Wagner, *Vegan: Community Ecology Package. R Package Version 2.4.4* (2017); <http://CRAN.R-project.org/package=vegan>.
41. M. A. McPeck, The macroevolutionary consequences of ecological differences among species. *Palaeontology* **50**, 111–129 (2007).
42. I. Renberg, A procedure for preparing large sets of diatom slides from sediment cores. *J. Paleolimnol.* **4**, 87–90 (1990).
43. M. A. R. Munro, A. M. Kreiser, R. W. Battarbee, S. Juggins, A. C. Stevenson, D. S. Anderson, N. G. Anderson, F. Berge, H. J. B. Birks, R. B. Davis, R. J. Flower, S. C. Fritz, E. Y. Haworth, V. J. Jones, J. C. Kingston, I. Renberg, Diatom quality control and data handling. *Phil. Trans. R. Soc. Lond. B* **327**, 257–261 (1990).
44. J. M. Reed, A. Cvetkoska, Z. Levkov, H. Vogel, B. Wagner, The last glacial-interglacial cycle in Lake Ohrid (Macedonia/ Albania): Testing diatom response to climate. *Biogeosciences* **7**, 3083–3094 (2010).
45. A. Cvetkoska, J. Reed, Z. Levkov, *Diatoms as Indicators of Environmental Change in Ancient Lake Ohrid during the Last Glacial-Interglacial Cycle (ca. 140 ka)*, vol. 15 (Diatom Monographs, A.R.G. Gantner, 2012).
46. Z. Levkov, S. Krstic, D. Metzeltin, T. Nakov, *Diatoms of Lakes Prespa and Ohrid*, vol. 16 (Iconographia Diatomologica, A.R.G. Gantner, 2007).
47. N. Ognjanova-Rumenova, M. Yaneva, I. Botev, Paleocological development of the Neogene Sofia Basin (southwestern Bulgaria) based on sedimentological and paleontological evidence. *Geol. Carpath.* **59**, 59–71 (2008).
48. N. Ognjanova-Rumenova, E. Jovanovska, A. Cvetkoska, Z. Levkov, Two new *Tertiarius* (Bacillariophyta, Coscinodiscophyceae) species from Mariovo Neogene Basin, Macedonia. *Fottea* **15**, 51–62 (2015).

49. E. Jovanovska, A. Cvetkoska, T. Hauffe, Z. Levkov, B. Wagner, R. Sulpizio, A. Francke, C. Albrecht, T. Wilke, Differential resilience of ancient sister lakes Ohrid and Prespa to environmental disturbances during the Late Pleistocene. *Biogeosciences* **13**, 1149–1161 (2016).
50. A. Cvetkoska, Z. Levkov, J. M. Reed, B. Wagner, K. Panagiotopoulos, M. J. Leng, J. H. Lacey, Quaternary climate change and Heinrich events in the southern Balkans: Lake Prespa diatom palaeolimnology from the last interglacial to present. *J. Paleolimnol.* **53**, 215–231 (2015).
51. X. Zhang, J. Reed, B. Wagner, A. Francke, Z. Levkov, Lateglacial and Holocene climate and environmental change in the northeastern Mediterranean region: Diatom evidence from Lake Dojran (Republic of Macedonia/Greece). *Quat. Sci. Rev.* **103**, 51–66 (2014).
52. M. D. Guiry, G. M. Guiry, *AlgaeBase, World-Wide Electronic Publication* (National University of Ireland, Galway, 2019).
53. E. Paradis, K. Schliep, Ape 5.0: An environment for modern phylogenetics and evolutionary analyses in R. *Bioinformatics* **35**, 526–528 (2019).
54. D. Silvestro, A. Antonelli, N. Salamin, X. Meyer, Improved estimation of macroevolutionary rates from fossil data using a Bayesian framework. *Paleobiology* **45**, 546–570 (2019).
55. M. M. Pires, B. D. Rankin, D. Silvestro, T. B. Quental, Diversification dynamics of mammalian clades during the K–Pg mass extinction. *Biol. Lett.* **14**, 20180458 (2018).
56. D. Silvestro, A. Zizka, C. D. Bacon, B. Cascales-Miñana, N. Salamin, A. Antonelli, Fossil biogeography: A new model to infer dispersal, extinction and sampling from palaeontological data. *Philos. Trans. R. Soc. B Biol. Sci.* **371**, 20150225 (2016).
57. T. Hauffe, *The R Package 'simDES' 0.1* (2019); <https://github.com/thauffe/simDES>.
58. C. D. L. Orme, R. P. Freckleton, G. H. Thomas, T. Petzoldt, S. A. Fritz, N. J. B. Isaac, W. D. Pearse, *Caper: Comparative Analyses of Phylogenetics and Evolution in R* (2019); <https://CRAN.R-project.org/package=caper>.

59. D. P. Faith, Conservation evaluation and phylogenetic diversity. *Biol. Conserv.* **61**, 1–10 (1992).
60. C. O. Webb, D. D. Ackerly, M. A. McPeck, M. J. Donoghue, Phylogenies and community ecology. *Annu. Rev. Ecol. Syst.* **33**, 475–505 (2002).
61. S. W. Kembel, P. D. Cowan, M. R. Helmus, W. K. Cornwell, H. Morlon, D. D. Ackerly, S. P. Blomberg, C. O. Webb, Picante: R tools for integrating phylogenies and ecology. *Bioinformatics* **26**, 1463–1464 (2010).
62. T. H. Kirschenmann, P. Damien, S. G. Walker, A note on the e–a histogram. *Stat. Probabil. Lett.* **103**, 105–109 (2015).
63. D. Silvestro, J. Schnitzler, Inferring Macroevolutionary Dynamics in Mountain Systems from Fossils, in *Mountains, Climate, and Biodiversity*, C. Hoorn, A. Perrigo, A. Antonelli, Eds. (Wiley-Blackwell, 2018), pp. 217–230.
64. T. H. G. Ezard, A. Purvis, Environmental changes define ecological limits to species richness and reveal the mode of macroevolutionary competition. *Ecol. Lett.* **19**, 899–906 (2016).
65. N. Dumurdzanov, T. Serafimovski, B. C. Burchfiel, *Evolution of the Neogene-Pleistocene basins of Macedonia* (Geological Society of America Digital Map and Chart Series 1, 2004).
